# Supplementary material
Source: PubMed Central journal article supplement (PMC9512529)
Supplement: mmc5.pdf [file mmc5.pdf]

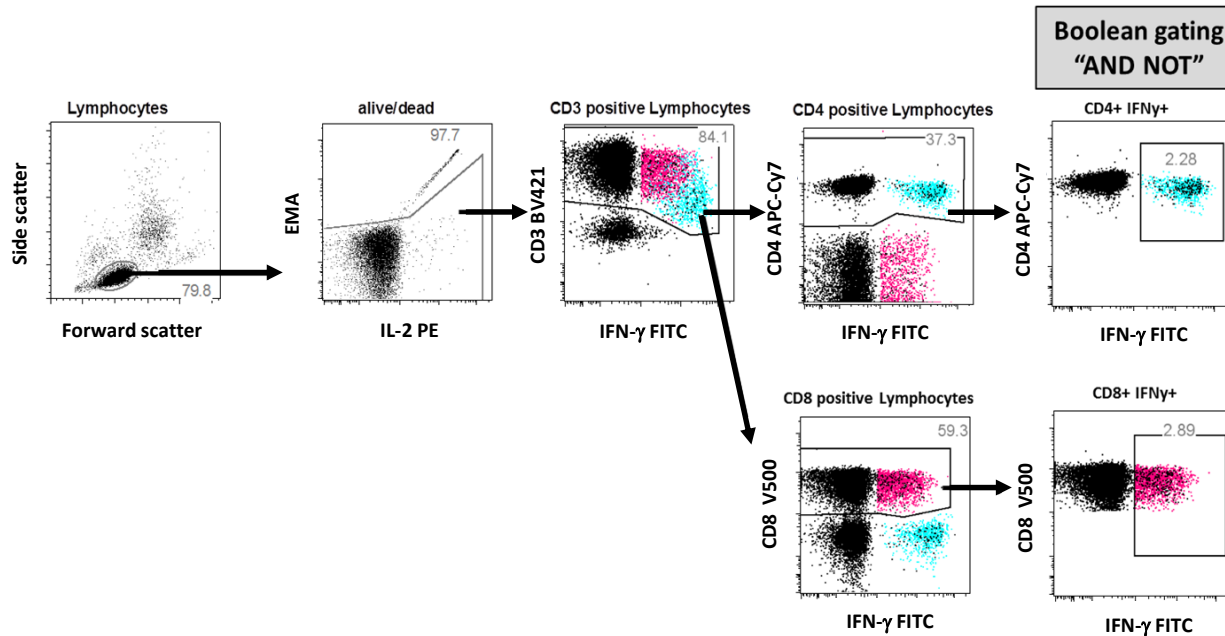

**Supplementary Figure 3**

**Supplementary Figure 3. Gating strategy used for the identification of IFN-γ producing CD8<sup>+</sup> T cells and CD4<sup>+</sup> T cells.**

Sequential gating was applied to identify T cells by their characteristic FSC and SSC properties and CD3 expression excluding dead cells (EMA negative). Subsequently CD3 expressing IFN-γ producing CTLs and THCs were identified by Boolean gating according to the characteristic differential expression of CD4, CD8 and intracellular IFN-γ production. Data from a representative flow cytometric analysis of an intracellular IFN-γ staining of PBMCs following stimulation with CMV pp65 peptide mix is shown.
