# Supplementary material
Source: PubMed Central journal article supplement (PMC9512529)

# Supplementary Figure 1

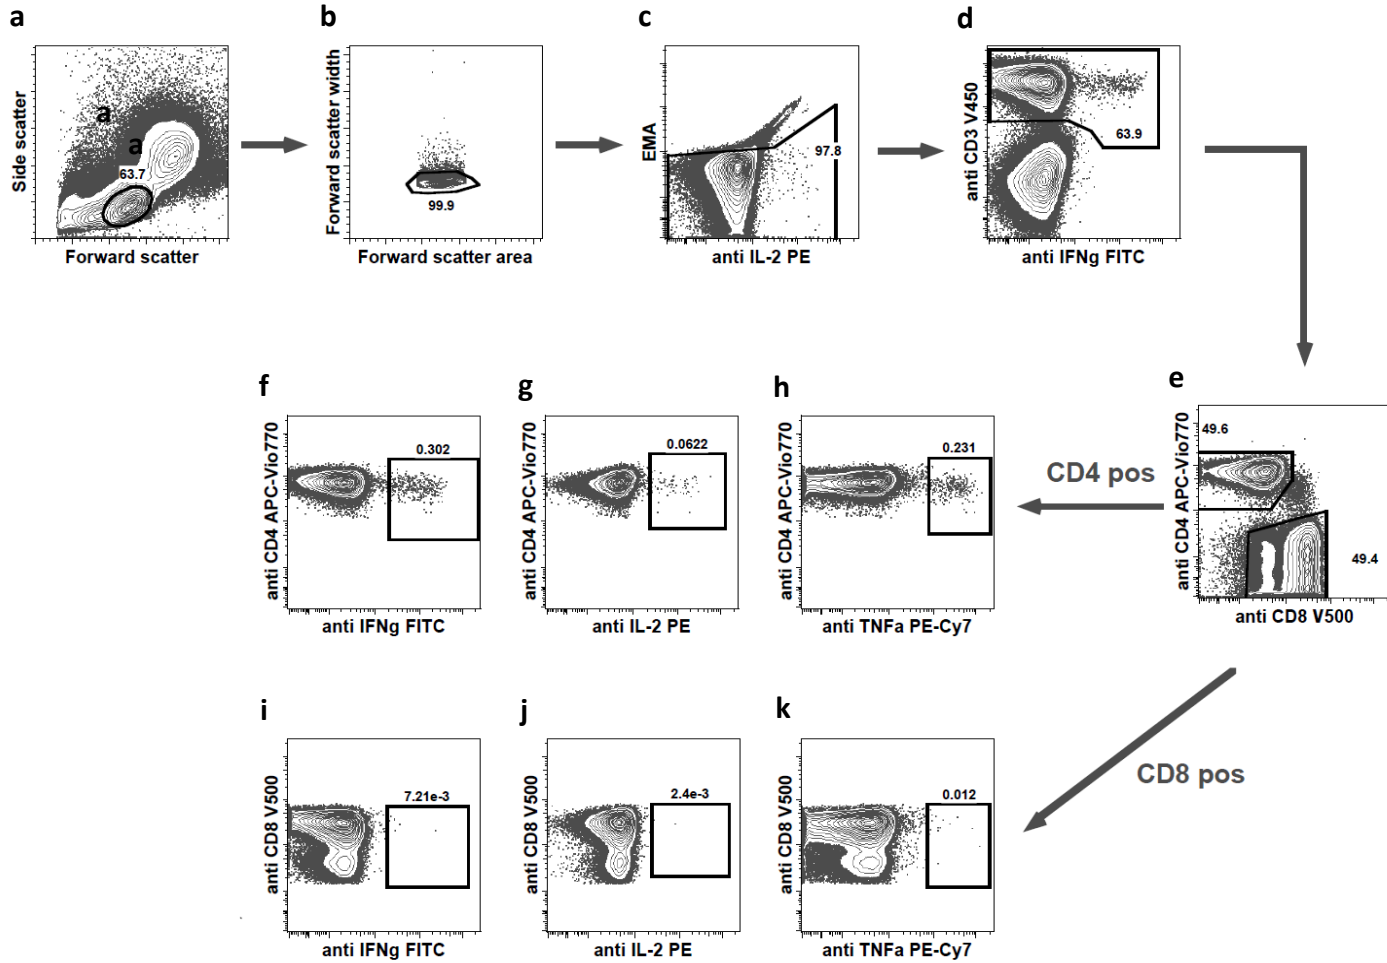

Supplement: mmc1.pdf [file mmc1.pdf]

## Supplementary Figure 2

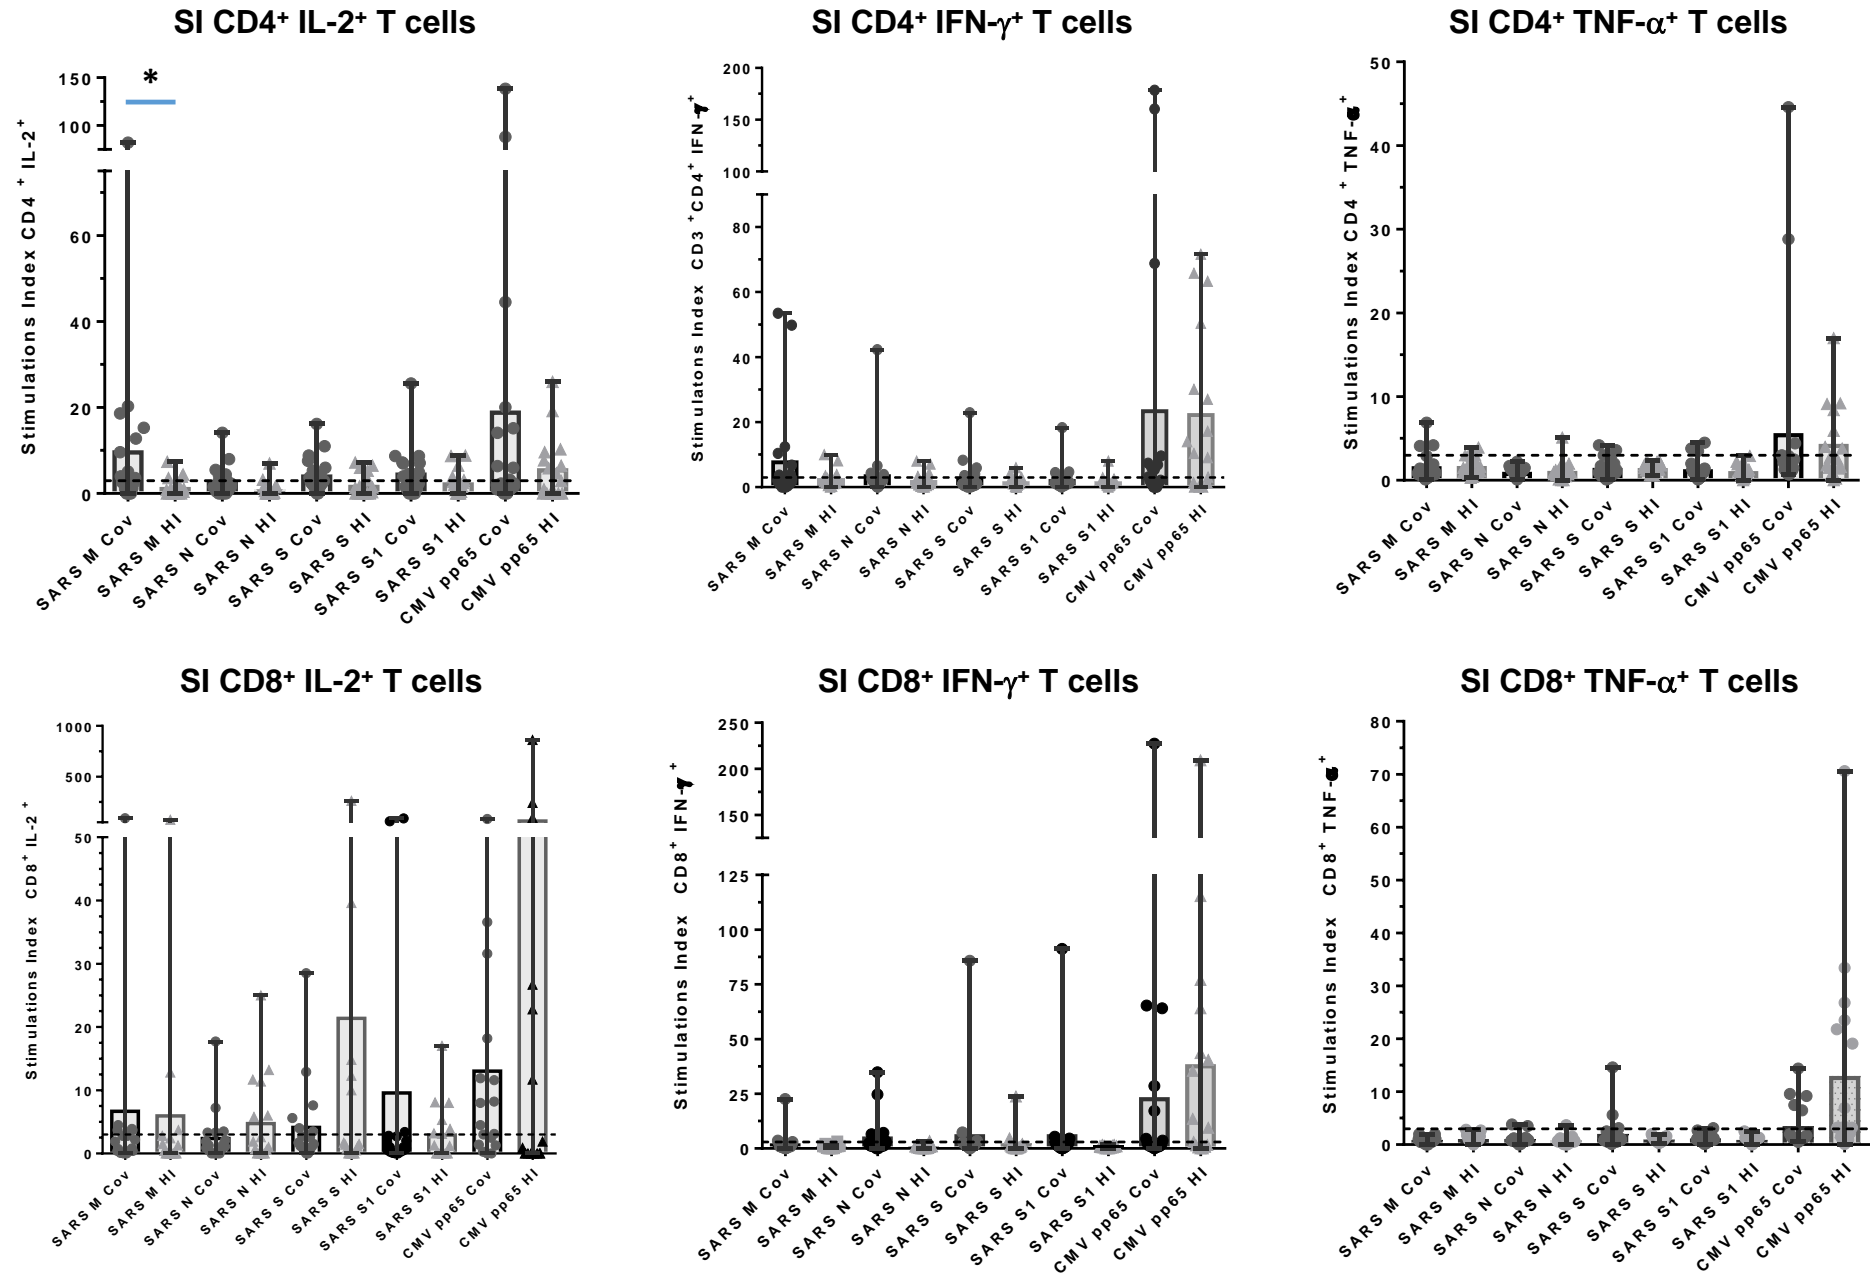

Supplement: mmc2.pdf [file mmc2.pdf]

Supplementary Figure 3

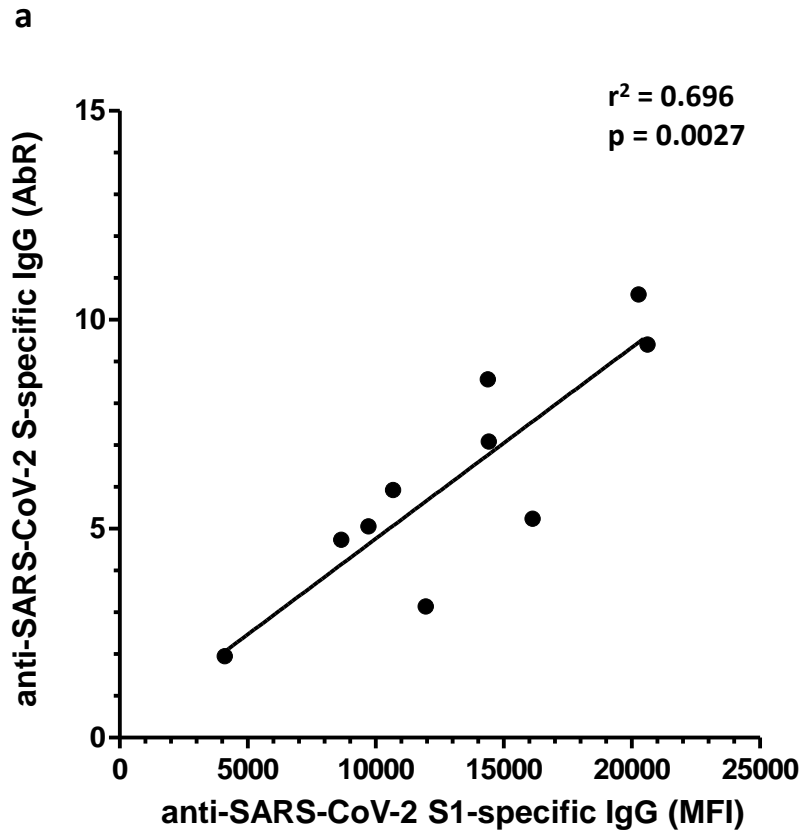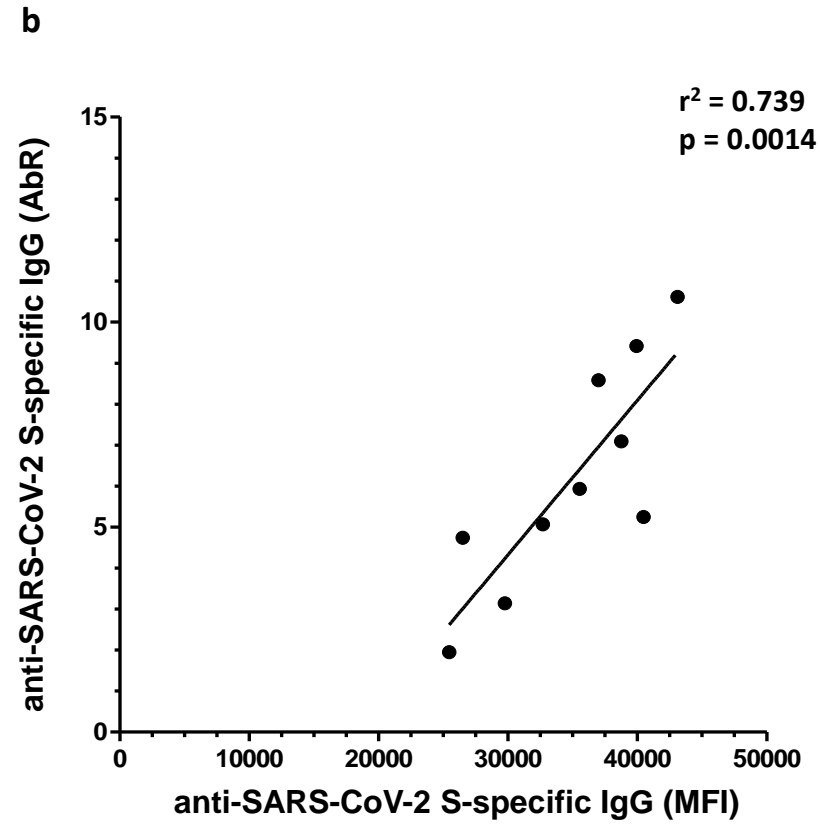

Supplement: mmc3.pdf [file mmc3.pdf]

Supplementary Figure 4

a

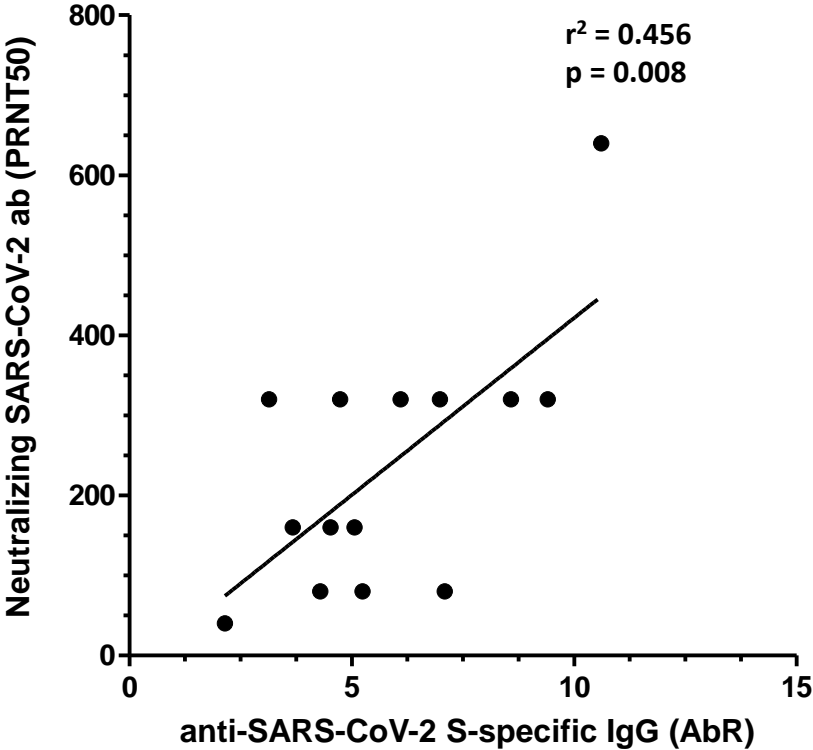

b

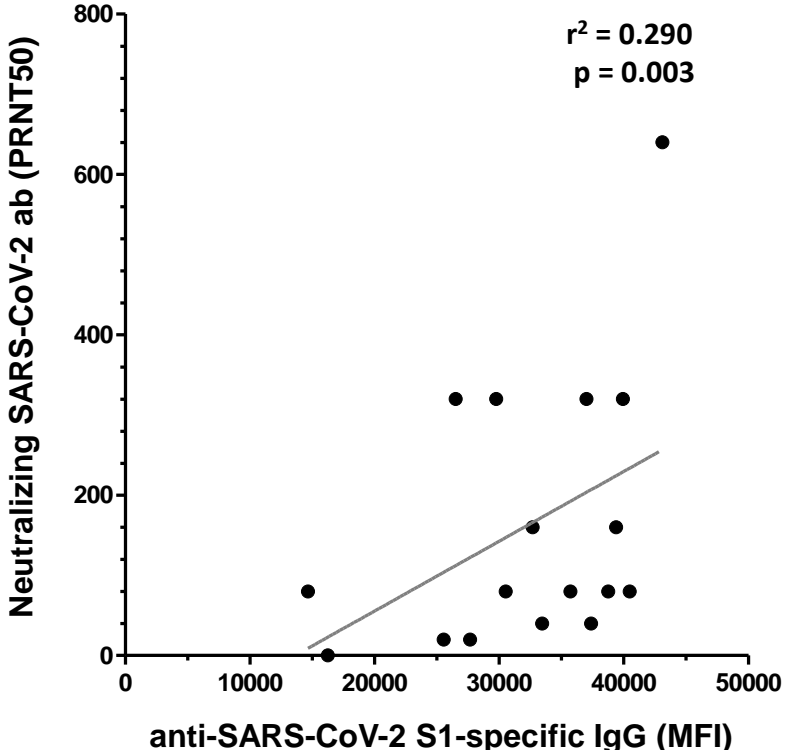

Supplement: mmc4.pdf [file mmc4.pdf]
